# Supplementary material for: Association Between Whole Blood Cell-Derived Inflammatory Markers and All-Cause Mortality in Patients with Sepsis-Related Acute Kidney Injury and Development of a Machine Learning Prognostic Model
Source: Research Square preprint supplement (doi:10.21203/rs.3.rs-7986649/v1), 2025-11-11
Supplement: Supplementary file 1 [file 249769352c81c326b48e46a1.docx]

| Tables3 | Performance of the Final Gatboost Model on the External Validation Cohort | | | | | | | | |  |  |  |  |
| --- | --- | --- | --- | --- | --- | --- | --- | --- | --- | --- | --- | --- | --- |
| Model | | AUC | BBRIER | FBETA | PRECISION | RECALL | SPECIFICITY |  |
| Catboost | | 0.755 | 0.204 | 0.781 | 0.875 | 0.706 | 0.625 |  |
