# Supplementary material for: Association Between Whole Blood Cell-Derived Inflammatory Markers and All-Cause Mortality in Patients with Sepsis-Related Acute Kidney Injury and Development of a Machine Learning Prognostic Model
Source: Research Square preprint supplement (doi:10.21203/rs.3.rs-7986649/v1), 2025-11-11
Supplement: Supplementary file 2 [file 2a3847c29737e6b4aa62a32c.docx]

Tables1 Univariate Logistic Regression Analysis of Factors

| Variable Name | Estimate | Std_Error | z_value | Pvalue | CI_2.5 | CI_97.5 | OR | Lower_OR | Upper_OR |
| --- | --- | --- | --- | --- | --- | --- | --- | --- | --- |
| age | 0.0207671401493416 | 0.00334885164074164 | 6.20127207090682 | 5.6008591711991e-10 | 0.0142671802714675 | 0.0273995938736611 | 1.02098427770817 | 1.01436944223913 | 1.02777841467701 |
| gender | 0.0132264707873099 | 0.102115689962009 | 0.129524373700366 | 0.896942739970366 | -0.186120554206665 | 0.214384934215664 | 1.01331432746936 | 0.830173508040447 | 1.23909953481141 |
| htn | -0.271719569758417 | 0.1115226510863 | -2.43645185181395 | 0.0148321438960641 | -0.493072479478072 | -0.0555886781740156 | 0.762067938023663 | 0.61074700083778 | 0.945928136771102 |
| pna | 0.0293010927288142 | 0.100470310130336 | 0.291639318031397 | 0.77056241015777 | -0.168063510941939 | 0.225974896931852 | 1.02973459340226 | 0.845300147171237 | 1.25354419707781 |
| cva | 0.0919712975872351 | 0.206790532097625 | 0.44475584377246 | 0.656496207867671 | -0.330704663016442 | 0.482736639428387 | 1.09633335421676 | 0.718417312914195 | 1.62050307219368 |
| ckd | 0.173622553230798 | 0.11436891603983 | 1.51809214638645 | 0.128991170740927 | -0.0533126748730769 | 0.395339537876684 | 1.18960646795247 | 0.948083524236895 | 1.4848882811513 |
| t2dm | -0.0578339333097803 | 0.109047956600562 | -0.530353205256504 | 0.595867063992071 | -0.273837717830636 | 0.153935043189666 | 0.943806669273073 | 0.760455473611898 | 1.16641511771204 |
| hf | 0.3562670724425 | 0.10249296516061 | 3.4760148843798 | 0.000508924039745363 | 0.154532016127551 | 0.55650064764576 | 1.4279888738172 | 1.16711164385459 | 1.74455698676962 |
| mi | 0.5196468452641 | 0.11965794598009 | 4.34276922445722 | 1.40697906242115e-05 | 0.282207575692004 | 0.751629752222869 | 1.68143373854592 | 1.32605394798637 | 2.12045301509725 |
| ihd | 0.296414968144881 | 0.10206744264341 | 2.90410889572747 | 0.00368300035356052 | 0.0955640203495444 | 0.495863058009405 | 1.34502818489281 | 1.100279260042 | 1.64191469535573 |
| copd | 0.362555741427208 | 0.125089474728747 | 2.89837128354245 | 0.00375106243149746 | 0.113591746028644 | 0.604393227365302 | 1.43699731903517 | 1.12029466676416 | 1.83014139219886 |
| cov | 0.403346463248772 | 0.240856166930018 | 1.67463622953847 | 0.094005626377925 | -0.0902889086442997 | 0.858247837850879 | 1.49682539682673 | 0.913667180789933 | 2.35902367840521 |
| CRRT | 1.07176956673944 | 0.111788239650022 | 9.58749838171582 | 9.02465433427174e-22 | 0.851434068174212 | 1.28987622038144 | 2.9205430258274 | 2.34300447196783 | 3.63233691864717 |
| VENTILATION | -0.466081126184223 | 0.17030020589012 | -2.73682068526063 | 0.00620360976492744 | -0.792189515117781 | -0.123239122341533 | 0.627456378840715 | 0.452852182309061 | 0.884052240642156 |
| balance | 4.54883081627896e-05 | 1.25061461422154e-05 | 3.63727623566148 | 0.000275536383053238 | 2.08240646354635e-05 | 6.9873392226408e-05 | 1.00004548934277 | 1.00002082428146 | 1.00006987583343 |
| sofa | 0.157169422969233 | 0.012789909403301 | 12.2885485747592 | 1.04362999632236e-34 | 0.132261671259137 | 0.182427484147751 | 1.17019385482462 | 1.14140695358825 | 1.20012711955716 |
| gcs | -0.0550785170497608 | 0.0140938433458718 | -3.90798419551709 | 9.30693927360407e-05 | -0.082306777084754 | -0.0269946594584462 | 0.946410835649454 | 0.920989376917618 | 0.973366439814375 |
| first_hr(bpm) | 0.00388879250841867 | 0.00228813500217127 | 1.69954679454162 | 0.0892162054723343 | -0.000610441253114151 | 0.00836216397120333 | 1.00389636367305 | 0.999389745028241 | 1.00839722452357 |
| first_nbpm(mmHg) | -0.00240983916817362 | 0.00261313269617189 | -0.922203136374941 | 0.356422627436981 | -0.00757712005969743 | 0.000577266981532195 | 0.997593062163186 | 0.992451513947756 | 1.00057743363218 |
| first_rr(bpm) | 0.0216755722302979 | 0.0070024924130382 | 3.09540817065926 | 0.0019654222175341 | 0.00784707475489348 | 0.0353165555573447 | 1.02191219399084 | 1.00787794373691 | 1.03594759186761 |
| first_spo2(%) | -0.0329152096468012 | 0.0097514045357046 | -3.37543269036607 | 0.000736997177155084 | -0.0520735498414478 | -0.0136745393821064 | 0.967620601003344 | 0.949259046422923 | 0.986418532410588 |
| first_temperaturef(F) | -0.010433768497342 | 0.0110697026432067 | -0.942551831213374 | 0.345910187826551 | -0.030722720193409 | 0.01419295986862 | 0.98962047444849 | 0.969744426347492 | 1.01429415812433 |
| PLR | 0.000435135906494975 | 0.000142535273200212 | 3.05282963806272 | 0.00226694596567992 | 0.000148339469863549 | 0.000709562844932701 | 1.00043523059186 | 1.00014835047271 | 1.0007098146442 |
| first_hemoglobin | -0.0490651759355092 | 0.0201981748986247 | -2.42918858668018 | 0.0151326587246407 | -0.0889033056076829 | -0.00969836439545375 | 0.952119072424945 | 0.914934038288205 | 0.990348513073197 |
| first_rdw | 0.126861884603407 | 0.0167508547401985 | 7.57345738895135 | 3.63419950628226e-14 | 0.0938850657831464 | 0.159605062127409 | 1.13526021003881 | 1.09843349106875 | 1.17304749861263 |
| NPAR | 0.00724316262128337 | 0.00184693868278385 | 3.92171255537618 | 8.79218406572812e-05 | 0.00356253450854219 | 0.0108465968887259 | 1.00726945777201 | 1.00356888787706 | 1.01090563448 |
| SII | 3.74743471440276e-05 | 9.2730572353024e-06 | 4.04120735946321 | 5.31767108980541e-05 | 1.9474588711563e-05 | 5.58538680565721e-05 | 1.00003747504932 | 1.00001947477834 | 1.00005585542791 |
| PNR | -0.000694461182791862 | 0.000982397600716249 | -0.706904396229737 | 0.479625891805091 | -0.00337067232663112 | 0.000138287869301378 | 0.999305779899565 | 0.9966350020121 | 1.00013829743151 |
| NLR | 0.0154992177209872 | 0.0022889104775752 | 6.77143901993343 | 1.27507703977262e-11 | 0.0109821862582157 | 0.0199678732039348 | 1.01561995355983 | 1.0110427118305 | 1.02016856475284 |
| first_glucose(mg/dl) | 0.000255120536817712 | 0.000572593194529879 | 0.445552862407274 | 0.655920266716824 | -0.000912126894845923 | 0.00133943560759415 | 1.00025515308283 | 0.999088288966441 | 1.00134033305211 |
| first_potassium(mEq/L) | 0.137439719605286 | 0.0569288956646643 | 2.41423477481216 | 0.0157682983403911 | 0.024662976966507 | 0.248010588977157 | 1.14733254222897 | 1.02496962393565 | 1.28147350161581 |
| first_sodium(mEq/L) | 0.00147958132807475 | 0.00833371936815534 | 0.17754153490319 | 0.859083043264064 | -0.0148517366198139 | 0.0178181998061032 | 1.00148067644857 | 0.985258006457005 | 1.01797789098806 |
| first_lactate(mmol/L) | 0.143761976244019 | 0.0168920629729152 | 8.51062279808733 | 1.73001577455492e-17 | 0.110742974220686 | 0.177076833431556 | 1.15460925138424 | 1.11710774446337 | 1.19372280742335 |
| first_ph | -3.54578422300667 | 0.45363460307938 | -7.81638834193212 | 5.43604937086524e-15 | -4.43620685249853 | -2.65681171347465 | 0.028845991946606 | 0.0118407672216651 | 0.0701715926134647 |
| first_po2(mmHg) | -0.00229247394362467 | 0.000603022667752141 | -3.80163809126813 | 0.000143742587585216 | -0.00351092057252326 | -0.00114432378823956 | 0.997710151767925 | 0.996495235502506 | 0.998856330700554 |
| first_pt(seconds) | 0.0258915808005388 | 0.00417503918169701 | 6.2015180394103 | 5.59211088716483e-10 | 0.0177881431900232 | 0.034194060966871 | 1.02622967944139 | 1.01794729447723 | 1.03478539869952 |
| first_ptt(seconds) | 0.00851542088267573 | 0.00168378614069337 | 5.05730548368164 | 4.25221791338277e-07 | 0.00515651643731386 | 0.0117693647410051 | 1.0085517802108 | 1.00516983414936 | 1.01183889622693 |
| first_alanine_aminotransferase_alt(U/L) | 6.23196297088974e-05 | 6.0659840716267e-05 | 1.0273622378996 | 0.304249925885426 | -6.75915475707933e-05 | 0.000175500965279814 | 1.00006232157162 | 0.999932410736686 | 1.00017551636648 |
| first_asparate_aminotransferase_ast(U/L) | 2.48732600495079e-05 | 3.69898037480172e-05 | 0.672435577624313 | 0.501306439759788 | -5.53389960864024e-05 | 9.29247737122045e-05 | 1.00002487356939 | 0.999944662535088 | 1.00009292909135 |
| first_bilirubin_total(mg/dl) | 0.0386829673221939 | 0.00725199825845658 | 5.33411150190026 | 9.60135139024685e-08 | 0.0242969538184433 | 0.0528355225022538 | 1.03944089467742 | 1.02459452997795 | 1.05425622943166 |
| first_creatinine(mg/dl) | 0.0990563940683318 | 0.0227146106160795 | 4.36091094593586 | 1.29522077729073e-05 | 0.0537729422863073 | 0.143068692414687 | 1.10412856410488 | 1.05524497344028 | 1.15380905687407 |
| first_urea_nitrogen(mg/dl) | 0.0119897523312205 | 0.00161414360302471 | 7.42793411240062 | 1.10306876211209e-13 | 0.00881129168995567 | 0.0151477521012204 | 1.01206191753762 | 1.00885022538862 | 1.01526306078484 |
| NMB | 0.0876390520807851 | 0.146190229302797 | 0.599486384957111 | 0.548848586570797 | -0.205984652319967 | 0.367951072440726 | 1.09159404231315 | 0.813845566828426 | 1.44477134810876 |
| SA | 0.754855653876502 | 0.164855474129406 | 4.57889346934252 | 4.67442179350214e-06 | 0.44236921951953 | 1.09021496865432 | 2.12730443304377 | 1.5563902840341 | 2.97491351698582 |
| VP | 1.29777902287063 | 0.184316464404078 | 7.04103687680065 | 1.90814492763921e-12 | 0.951618573422231 | 1.67634891339724 | 3.66115628678561 | 2.58989820907125 | 5.34600158070826 |
| IMMUNOS | -0.475868743500723 | 0.261479765537254 | -1.81990657106094 | 0.0687732340720503 | -1.0237195946186 | 0.00770224380888992 | 0.621345032469151 | 0.359256164568923 | 1.00773198239097 |
| NEPHTOX | -0.302342020862574 | 0.137437343788177 | -2.19985349344756 | 0.027817291222886 | -0.56699074494038 | -0.0275801027547215 | 0.739085239085159 | 0.56722981214832 | 0.972796755732501 |
| GC | 0.303918469843311 | 0.100596178016284 | 3.02117312840765 | 0.00251797343169516 | 0.106451128212681 | 0.500972125632408 | 1.3551585652954 | 1.11232356387665 | 1.65032481420466 |
| AHT | -0.651315053177391 | 0.119331009684274 | -5.45805365177619 | 4.81382214652641e-08 | -0.88290381742481 | -0.414779476389783 | 0.521359710009545 | 0.413580204900698 | 0.660485917385229 |
