# Supplementary material for: Association Between Whole Blood Cell-Derived Inflammatory Markers and All-Cause Mortality in Patients with Sepsis-Related Acute Kidney Injury and Development of a Machine Learning Prognostic Model
Source: Research Square preprint supplement (doi:10.21203/rs.3.rs-7986649/v1), 2025-11-11
Supplement: Supplementary file 3 [file 8521ee46467de68305ea60f0.docx]

**Table S4. Characteristics of participants in the External Validation Cohort**

| **Characteristic** | **Overall N=151** | **14-d survivors N=119** | **14-d non-survivors N=32** | **P value** |
| --- | --- | --- | --- | --- |
| **Age (year), mean (sd)** | 65.57 (14.82) | 66.76 (13.87) | 61.16 (17.43) | 0.100 |
| **Gender, n (%)** |  |  |  | 0.449 |
| Female | 65 (43.05%) | 49 (41.18%) | 16 (50.00%) |  |
| Male | 86 (56.95%) | 70 (58.82%) | 16 (50.00%) |  |
| **First nbpm (mmHg), mean (sd)** | 83.21 (18.49) | 83.51 (18.96) | 82.09 (16.83) | 0.682 |
| **First ph, mean (sd)** | 7.35 (0.11) | 7.36 (0.11) | 7.33 (0.12) | 0.176 |
| **First po2(mmH), mean (sd)** | 140.35 (89.13) | 140.23 (92.44) | 140.82 (77.83) | 0.972 |
| **First temperature(F), mean (sd)** | 36.86 (0.82) | 36.85 (0.84) | 36.90 (0.79) | 0.772 |
| **First hr (bpm), mean (sd)** | 99.86 (23.97) | 99.48 (24.22) | 101.28 (23.33) | 0.702 |
| **First spo2 (%), mean (sd)** | 95.61 (6.82) | 95.91 (6.16) | 94.50 (8.90) | 0.405 |
| **First creatinine (mg/dL), mean (sd)** | 2.15 (1.61) | 2.07 (1.59) | 2.44 (1.67) | 0.180 |
| **First urea nitrogen (mg/dL), mean (sd)** | 48.77 (34.05) | 48.42 (34.00) | 50.03 (34.78) | 0.791 |
| **Balance (mL), mean (sd)** | 573.72 (1,123.67) | 543.01 (1,186.91) | 687.91 (854.44) | 0.439 |
| **First alanine aminoTransFerase alt (U/L), mean (sd)** | 148.81 (500.27) | 158.49 (532.70) | 114.34 (334.78) | 0.707 |
| **First asparate aminoTransFerase ast (U/L), mean (sd)** | 178.69 (488.59) | 193.35 (521.82) | 125.75 (318.51) | 0.519 |
| **First bilirubin total (mg/dL), mean (sd)** | 1.83 (3.73) | 1.77 (3.91) | 2.03 (2.97) | 0.741 |
| **First potassium (mEq/L), mean (sd)** | 4.31 (0.89) | 4.30 (0.91) | 4.34 (0.82) | 0.814 |
| **First sodium (mEq/L), mean (sd)** | 139.03 (5.87) | 139.02 (5.92) | 139.09 (5.80) | 0.957 |
| **First pt (seconds), mean (sd)** | 16.03 (5.24) | 15.93 (5.43) | 16.42 (4.50) | 0.612 |
| **First ptt (seconds), mean (sd)** | 40.54 (20.57) | 40.06 (20.30) | 42.43 (21.72) | 0.550 |
| **First glucose (mg/dL), mean (sd)** | 163.45 (87.41) | 161.43 (89.14) | 171.22 (81.65) | 0.525 |
| **First hemoglobin (g/dL), mean (sd)** | 10.37 (2.12) | 10.43 (2.12) | 10.15 (2.15) | 0.545 |
| **First lactate (mmol/L), mean (sd)** | 3.32 (2.67) | 3.12 (2.66) | 4.02 (2.67) | 0.106 |
| **NLR, mean (sd)** | 13.91 (12.28) | 13.29 (11.83) | 16.27 (13.78) | 0.207 |
| **NPAR, mean (sd)** | 27.24 (8.73) | 27.26 (8.68) | 27.14 (9.07) | 0.949 |
| **PNR, mean (sd)** | 18.06 (10.99) | 18.67 (11.23) | 15.94 (9.84) | 0.224 |
| **SII, mean (sd)** | 2,168.04 (2,251.52) | 2,058.46 (2,161.40) | 2,593.59 (2,572.76) | 0.244 |
| **HTN, n (%)** |  |  |  | 0.141 |
| No | 101 (66.89%) | 83 (69.75%) | 18 (56.25%) |  |
| Yes | 50 (33.11%) | 36 (30.25%) | 14 (43.75%) |  |
| **PNA, n (%)** |  |  |  | 0.081 |
| No | 91 (60.26%) | 78 (65.55%) | 13 (40.63%) |  |
| Yes | 60 (39.74%) | 41 (34.45%) | 19 (59.38%) |  |
| **CVA, n (%)** |  |  |  | 0.697 |
| No | 140 (92.72%) | 111 (93.28%) | 29 (90.63%) |  |
| Yes | 11 (7.28%) | 8 (6.72%) | 3 (9.38%) |  |
| **CKD, n (%)** |  |  |  | 0.693 |
| No | 141 (93.38%) | 111 (93.28%) | 30 (93.75%) |  |
| Yes | 10 (6.62%) | 8 (6.72%) | 2 (6.25%) |  |
| **T2DM, n (%)** |  |  |  | 0.490 |
| No | 106 (70.20%) | 82 (68.91%) | 24 (75.00%) |  |
| Yes | 45 (29.80%) | 37 (31.09%) | 8 (25.00%) |  |
| **Heart failure, n (%)** |  |  |  | 0.850 |
| No | 147 (97.35%) | 116 (97.48%) | 31 (96.88%) |  |
| Yes | 4 (2.65%) | 3 (2.52%) | 1 (3.13%) |  |
| **Myocardial infarction, n (%)** |  |  |  | 0.603 |
| No | 150 (99.34%) | 118 (99.16%) | 32 (100.00%) |  |
| Yes | 1 (0.66%) | 1 (0.84%) | 0 (0.00%) |  |
| **Ischemic heart disease, n (%)** |  |  |  | 0.647 |
| No | 144 (95.36%) | 113 (94.96%) | 31 (96.88%) |  |
| Yes | 7 (4.64%) | 6 (5.04%) | 1 (3.13%) |  |
| **COPD, n (%)** |  |  |  | 0.481 |
| No | 141 (93.38%) | 112 (94.12%) | 29 (90.63%) |  |
| Yes | 10 (6.62%) | 7 (5.88%) | 3 (9.38%) |  |
| **COV, n (%)** |  |  |  | 0.419 |
| No | 120 (79.47%) | 96 (80.67%) | 24 (75.00%) |  |
| Yes | 31 (20.53%) | 23 (19.33%) | 8 (25.00%) |  |
| **CRRT, n (%)** |  |  |  | 0.170 |
| No | 134 (88.74%) | 108 (90.76%) | 26 (81.25%) |  |
| Yes | 17 (11.26%) | 11 (9.24%) | 6 (18.75%) |  |
| **VENTILATION, n (%)** |  |  |  | 0.771 |
| No | 94 (62.25%) | 73 (61.34%) | 21 (65.63%) |  |
| Yes | 57 (37.75%) | 46 (38.66%) | 11 (34.38%) |  |
| **NMB, n (%)** |  |  |  | 0.811 |
| No | 146 (96.69%) | 115 (96.64%) | 31 (96.88%) |  |
| &a' 'sp;   Yes | 5 (3.31%) | 4 (3.36%) | 1 (3.13%) |  |
| **SA, n (%)** |  |  |  | 0.180 |
| No | 120 (79.47%) | 98 (82.35%) | 22 (68.75%) |  |
| Yes | 31 (20.53%) | 21 (17.65%) | 10 (31.25%) |  |
| **VP, n (%)** |  |  |  | 0.221 |
| No | 107 (70.86%) | 88 (73.95%) | 19 (59.38%) |  |
| Yes | 44 (29.14%) | 31 (26.05%) | 13 (40.63%) |  |
| **IMMUNOS, n (%)** |  |  |  | 0.470 |
| No | 148 (98.01%) | 117 (98.32%) | 31 (96.88%) |  |
| Yes | 3 (1.99%) | 2 (1.68%) | 1 (3.13%) |  |
| **NEPHTOX, n (%)** |  |  |  | 0.540 |
| No | 133 (88.08%) | 106 (89.08%) | 27 (84.38%) |  |
| Yes | 18 (11.92%) | 13 (10.92%) | 5 (15.63%) |  |
| **GC, n (%)** |  |  |  | 0.180 |
| No | 120 (79.47%) | 98 (82.35%) | 22 (68.75%) |  |
| Yes | 31 (20.53%) | 21 (17.65%) | 10 (31.25%) |  |
| **AHT, n (%)** |  |  |  | 0.435 |
| No | 107 (70.86%) | 83 (69.75%) | 24 (75.00%) |  |
| Yes | 44 (29.14%) | 36 (30.25%) | 8 (25.00%) |  |
