# Supplementary material for: Association Between Whole Blood Cell-Derived Inflammatory Markers and All-Cause Mortality in Patients with Sepsis-Related Acute Kidney Injury and Development of a Machine Learning Prognostic Model
Source: Research Square preprint supplement (doi:10.21203/rs.3.rs-7986649/v1), 2025-11-11
Supplement: Supplementary file 4 [file 986ec7bb272a5a78a8184147.docx]

### Hyperparameter Settings for CatBoost Model

| **Parameter** | **Value / Range** | **Description** |
| --- | --- | --- |
| Selected Classification Model | Catboost | The machine learning algorithm used. |
| Random Seed | 123 | Ensures reproducibility of results. |
| Model Name | model | User-defined name for the model. |
| Parameter Setting Rule | Automatic Tuning | Parameters were optimized automatically. |
| K-Fold (for Tuning) | 15 | Number of folds used in the hyperparameter tuning process. |
| Search Accuracy | 3 | Accuracy level for the tuning search. |
| Maxdepth | 1, 3 | Range explored for the maximum depth of the trees. |
| Numtrees | 200, 300 | Range explored for the number of trees. |
| Learning Rate | 0.01, 0.05 | Range explored for the learning rate. |
| L2 Regularization Coefficient | 30, 50 | Range explored for L2 regularization. |
| threads | 8 | Number of CPU threads to use. |
| Sampling Method | cv | Cross-validation. |
| Folds (for Validation) | 5 | Number of folds for cross-validation. |
| Repeat | No (False) | Whether to repeat the process (box is unchecked). |
| Evaluation Metrics | AUC (two class), Brier Score | Metrics used to evaluate model performance. |
